# Supplementary material for: Selective electrochemical reduction of carbon dioxide to ethanol via a relay catalytic platform
Source: Royal Society of Chemistry journal article supplement (doi:10.1039/d0sc01133a), 2020-01-01
Supplement: d0sc01133a1.pdf [file d0sc01133a1.pdf]

## Electronic Supplementary Information:

### Selective electrochemical reduction of carbon dioxide to ethanol by relay catalytic platform

Juan Du,<sup>a,b</sup> Shaopeng Li,<sup>a,b</sup> Shulin Liu,<sup>a,b</sup> Yu Xin,<sup>a,b</sup> Bingfeng Chen,<sup>a</sup> Huizhen Liu,<sup>\*a,b</sup> Buxing Han<sup>a,b</sup>

<sup>a</sup>Beijing National Laboratory for Molecular Sciences, Key Laboratory of Colloid and Interface and Thermodynamics, CAS Research/Education Center for Excellence in Molecular Sciences, Institute of Chemistry, Chinese Academy of Sciences, Beijing 100190, China

<sup>b</sup>School of Chemistry and Chemical Engineering, University of Chinese Academy of Sciences, Beijing 100049, China

\*E-mail: liuhz@iccas.ac.cn

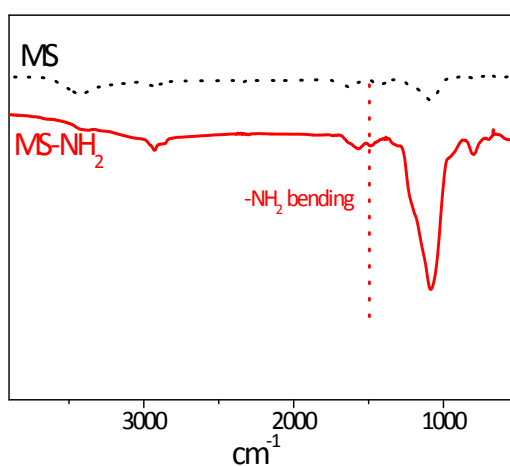

Fig. S1. IR spectrum of MS and MS-NH<sub>2</sub>.

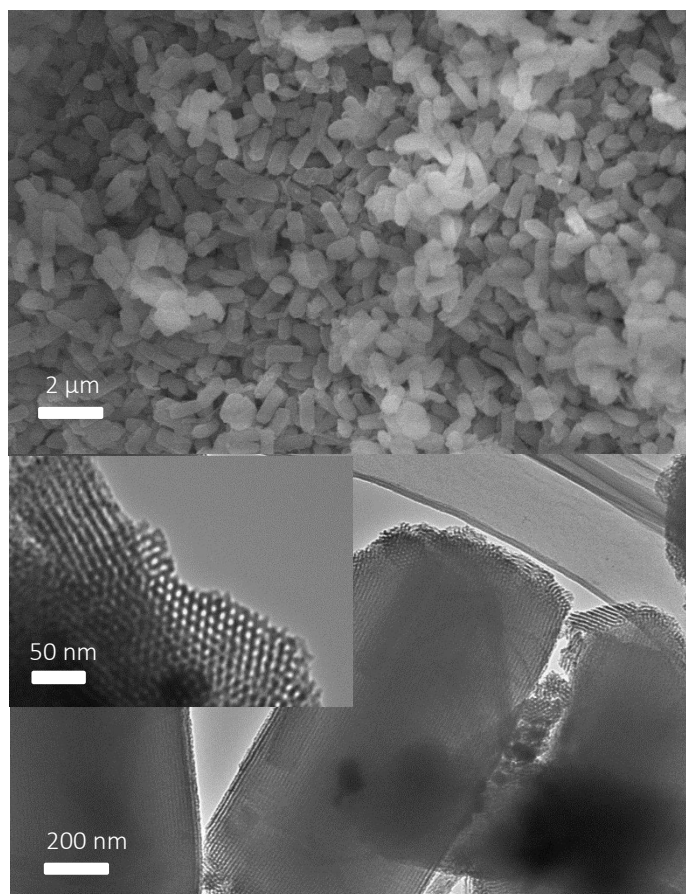

**Fig. S2.** SEM (a) and TEM (b) images of MS-NH<sub>2</sub>.

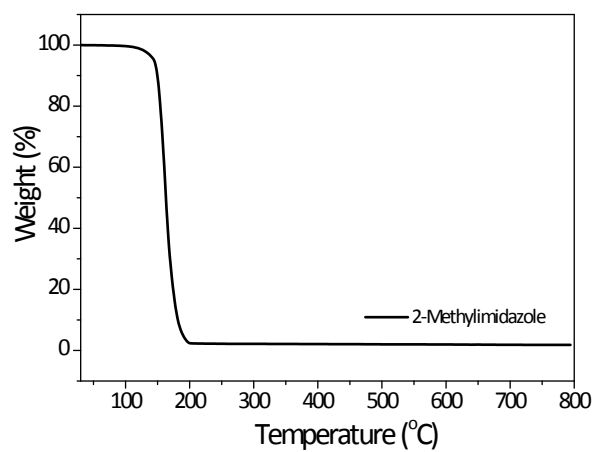

**Fig. S3.** TGA analysis of 2-methylimidazole in N<sub>2</sub>, which shows that the 2-methylimidazole can be completely decomposed.

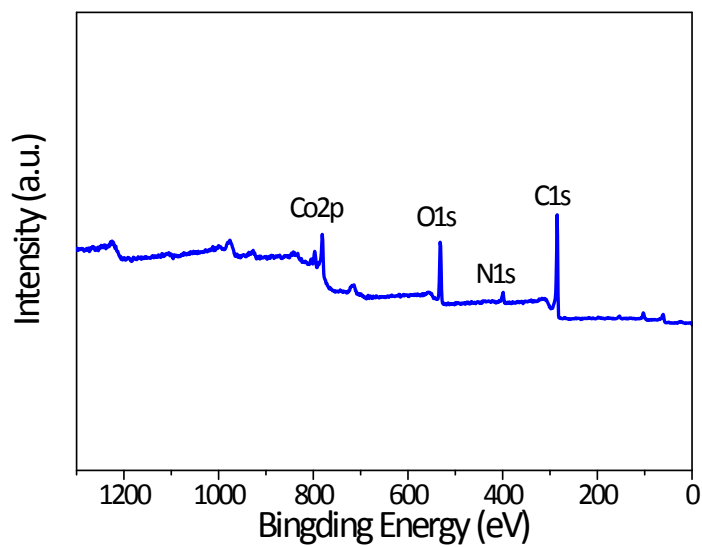

Fig. S4. XPS spectrum of CNT-MC/Co.

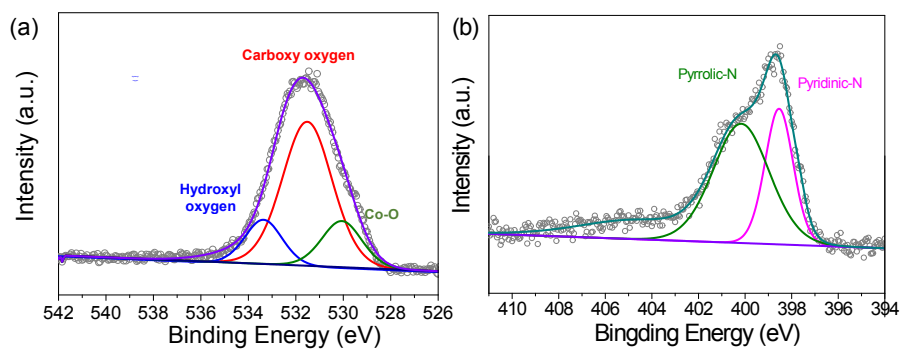

Fig. S5. O1s (a) and N1s (b) spectrum of MC-CNT/Co.

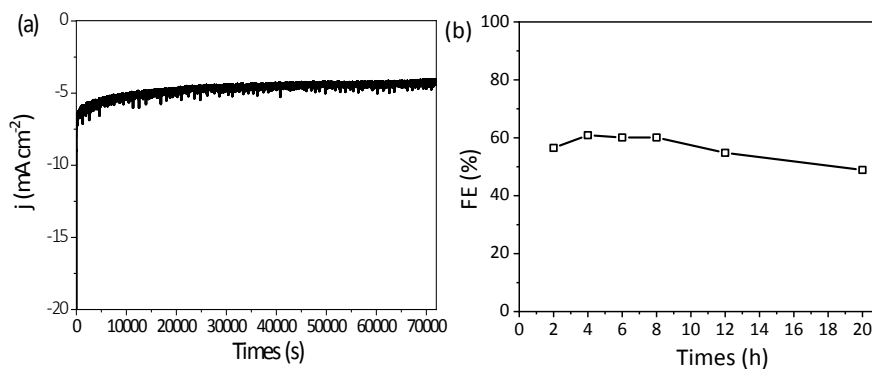

**Fig. S6.** Total current density (a) and FE (b) versus time in 0.5 M  $\text{KHCO}_3$  under a  $\text{CO}_2$  atmosphere on MC-CNT/Co.

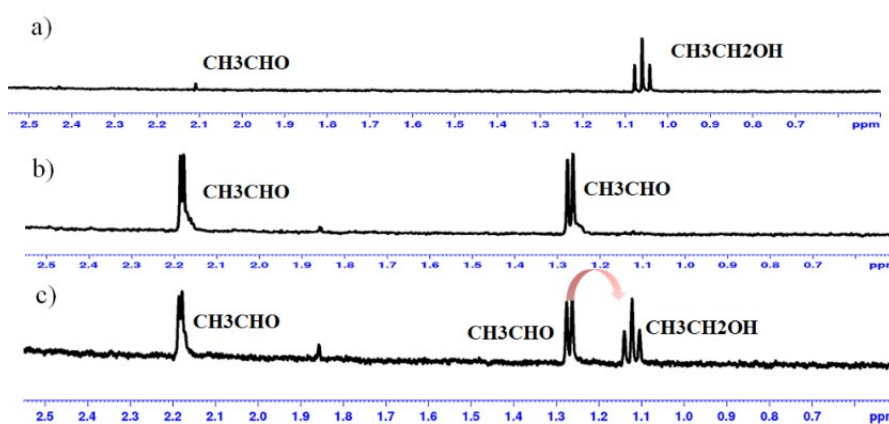

**Fig. S7.** Liquid product analysis ( $^1\text{H}$  NMR spectra) over MC-CNT/Co catalyst at  $-0.32$  V (vs RHE) in  $\text{CO}_2$ -saturated (a) and  $\text{CH}_3\text{CHO}$ -added (b and c) 0.5 M  $\text{KHCO}_3$  solution.

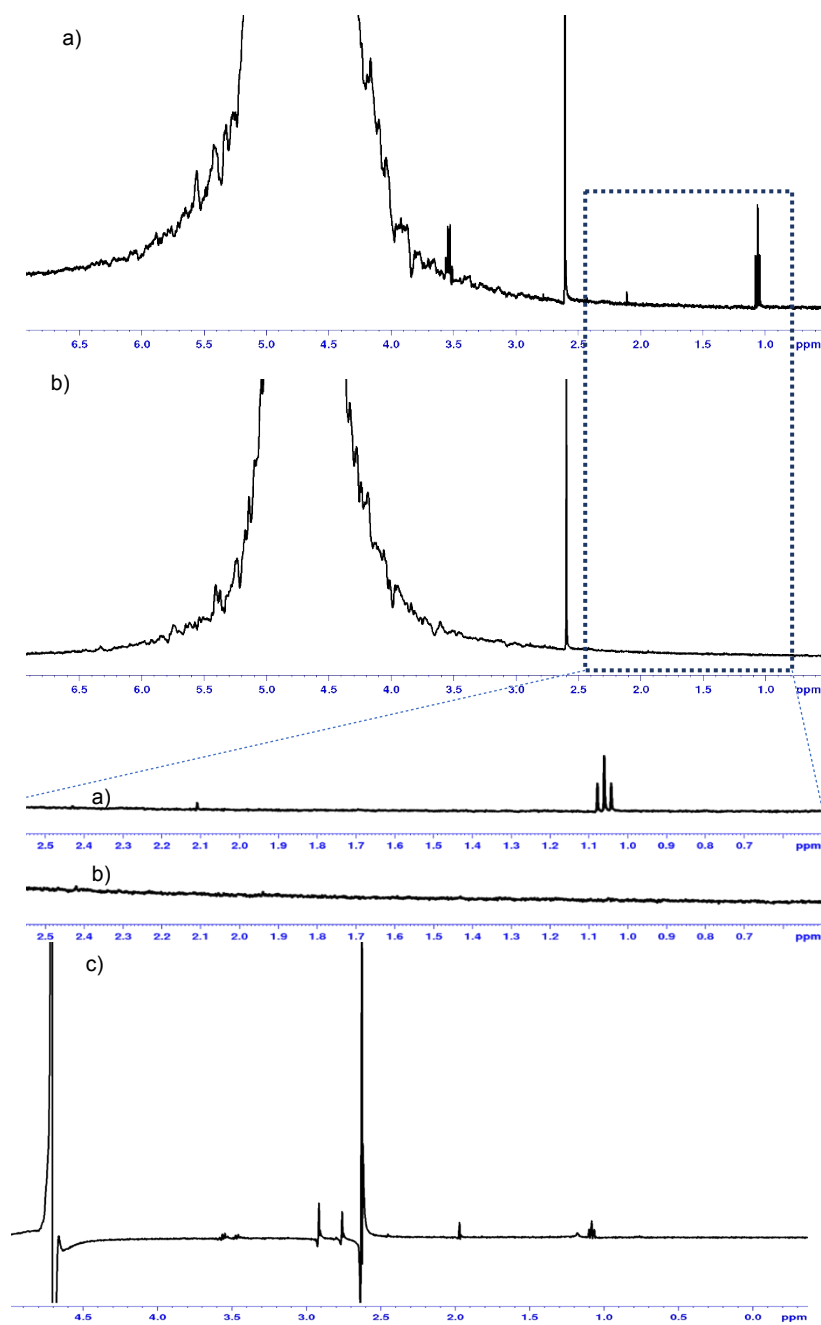

**Fig. S8.** Liquid product analysis ( $^1\text{H}$  NMR spectra) over MC-CNT/Co catalyst at  $-0.32\text{ V}$  (vs RHE) in  $\text{CO}_2$ -saturated (a) and Ar-saturated (b)  $0.5\text{ M KHCO}_3$  solution; and liquid product analysis ( $^1\text{H}$  NMR spectra using water suppression method) over MC-CNT/Co catalyst at  $-0.32\text{ V}$  (vs RHE) in  $\text{CO}_2$ -saturated (c).

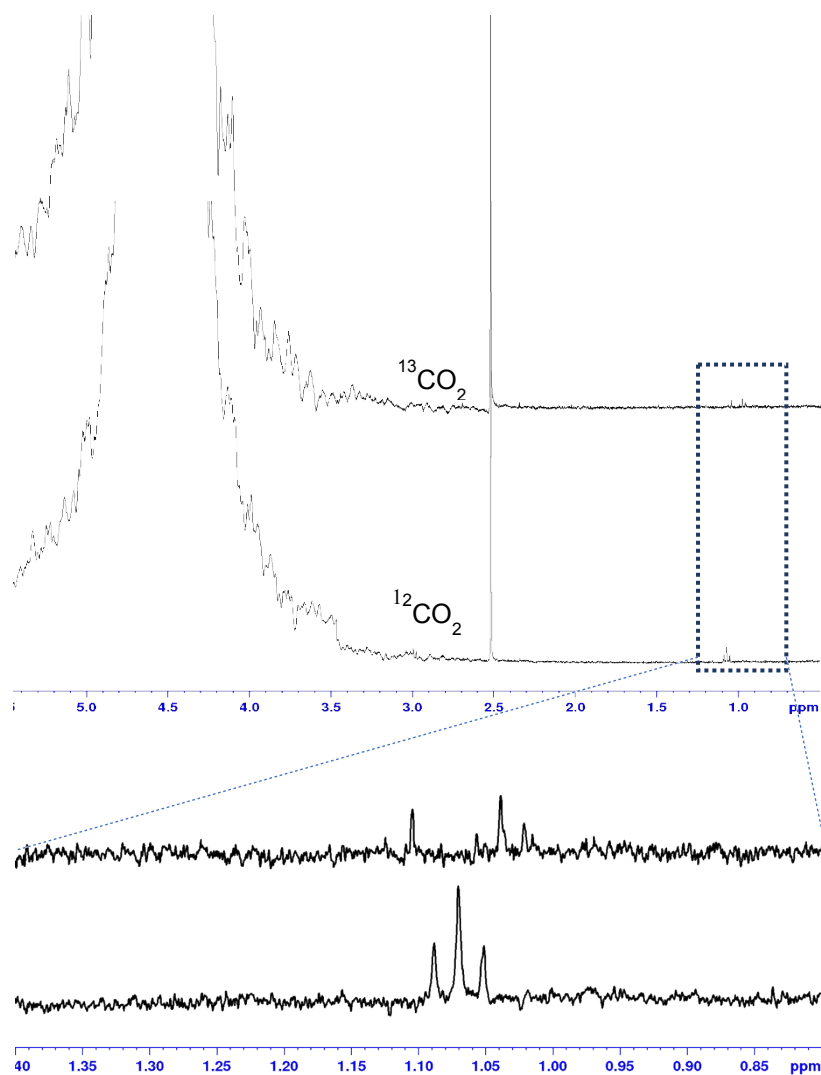

**Fig. S9.** Liquid product analysis ( $^1\text{H}$  NMR spectra) over MC-CNT/Co catalyst over electrolysis at  $-0.32$  V (vs RHE) in  $^{12}\text{CO}_2$ -saturated and  $^{13}\text{CO}_2$ -saturated  $0.5$  M  $\text{KHCO}_3$  solution.

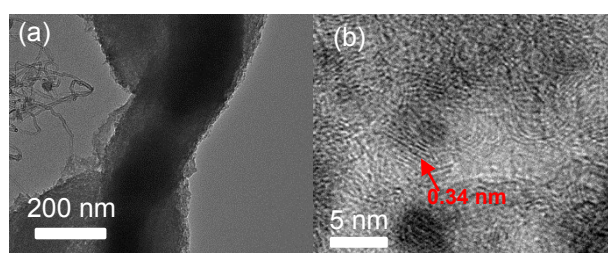

**Fig. S10.** TEM images of MC-CNT.

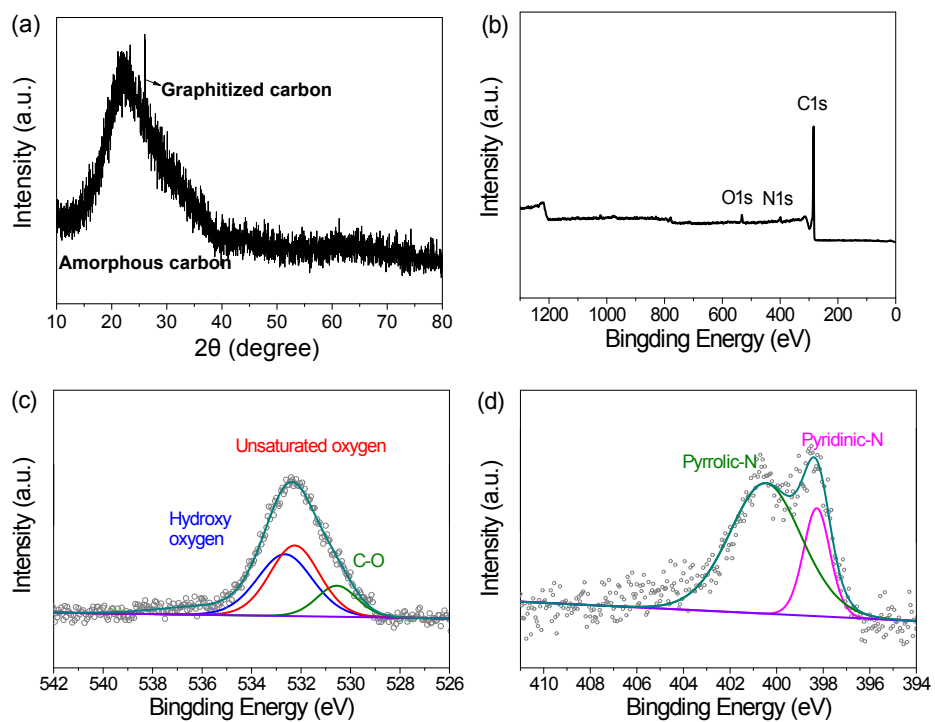

**Fig. S11.** XRD (a) and XPS (c-d) spectra of MC-CNT.

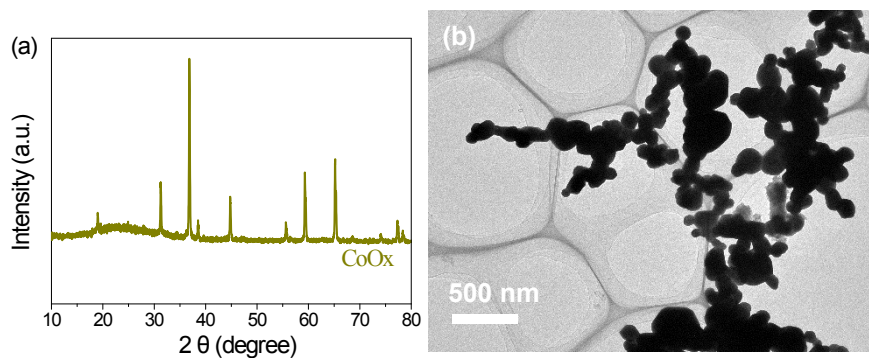

**Fig. S12.** XRD pattern(a) and TEM image (b) of Co-Ox derived from  $\text{Co}(\text{NO}_3)_2$  pyrolysis.

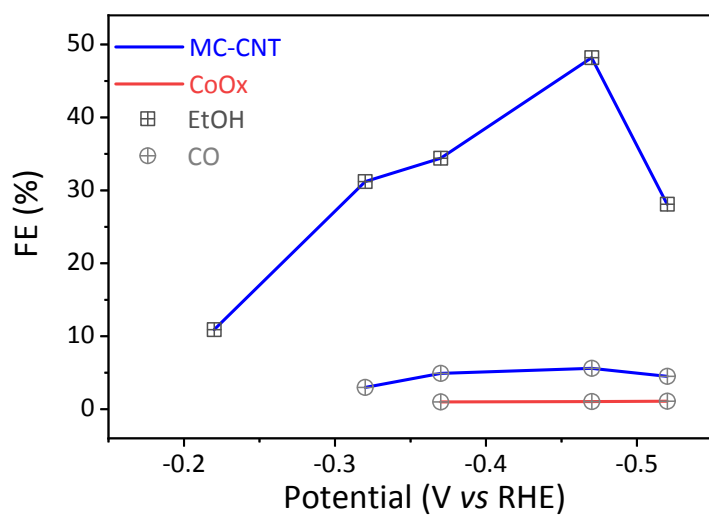

**Fig. S13.** Faradic efficiencies of EtOH and CO over CoOx and MC-CNT catalysts in CO<sub>2</sub>-saturated 0.5 M KHCO<sub>3</sub> solution in the potential range from -0.2 V to -0.6 V (vs RHE).

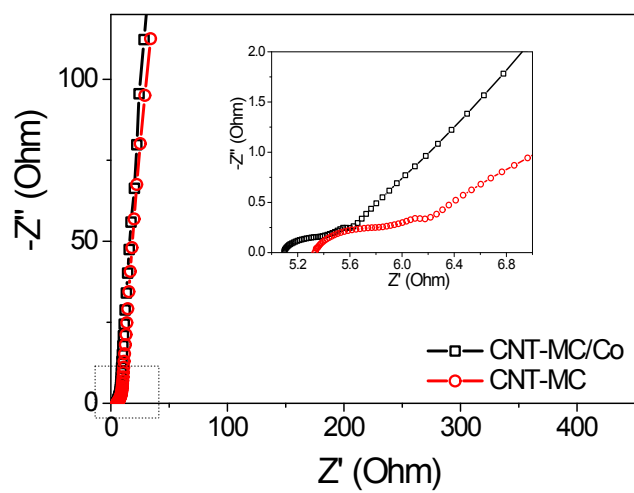

**Fig. S14.** The experimental and simulated EIS spectra of CNT-MC/Co and CNT-MC electrodes in CO<sub>2</sub>-saturated 0.5 M KHCO<sub>3</sub>.
